# Supplementary material for: Parkin Overexpression Attenuates Sepsis-Induced Muscle Wasting
Source: PubMed Central journal article supplement (PMC7349807; doi:10.3390/cells9061454), 2020-06-11
Supplement: cells-09-01454-s001.pdf [file cells-09-01454-s001.pdf]

## Supplemental Materials

Figure S1. Construction of our AAV1 designed to overexpress Parkin

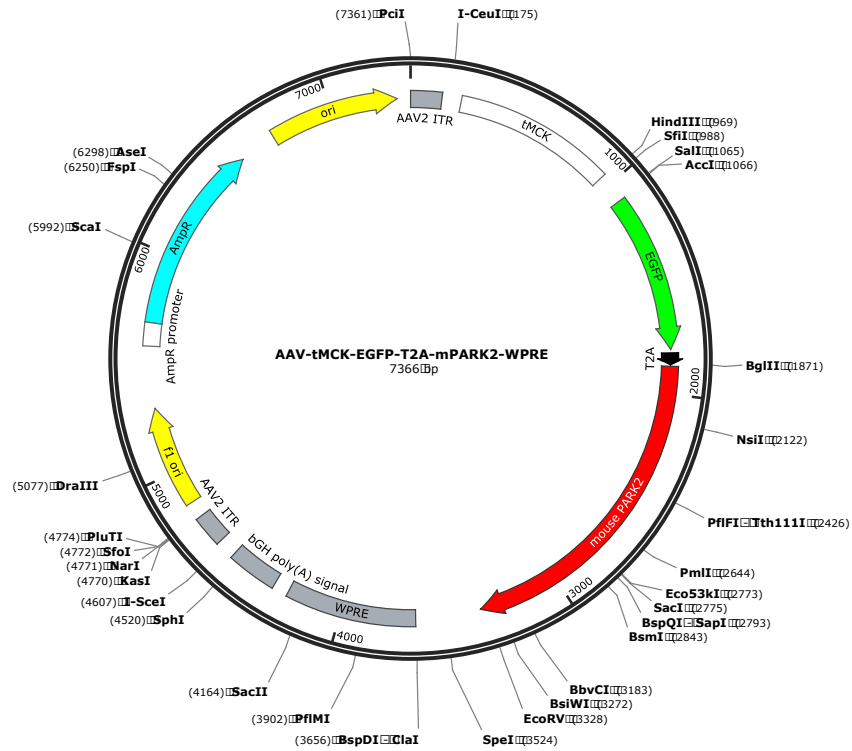

**Figure S2.** The impact of sepsis and Parkin overexpression on the content and phosphorylation levels of proteins regulating protein synthesis. Immunoblot detection and quantification of p-AKT (Ser473), AKT, p4EBP1(Thr37/46) and 4EBP1. Ponceau stains were used as loading controls. Data are presented as mean  $\pm$  SEM. (n= 6-9/group).

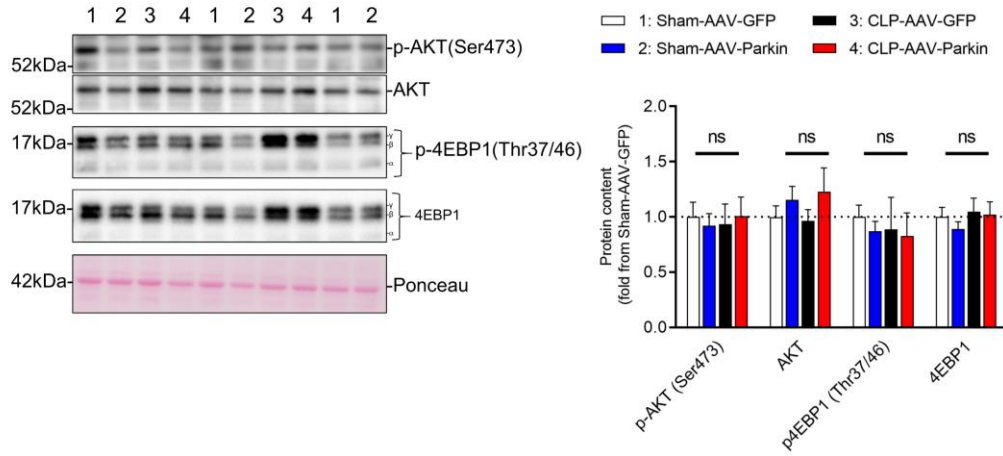

Figure S3. Additional TEM images.

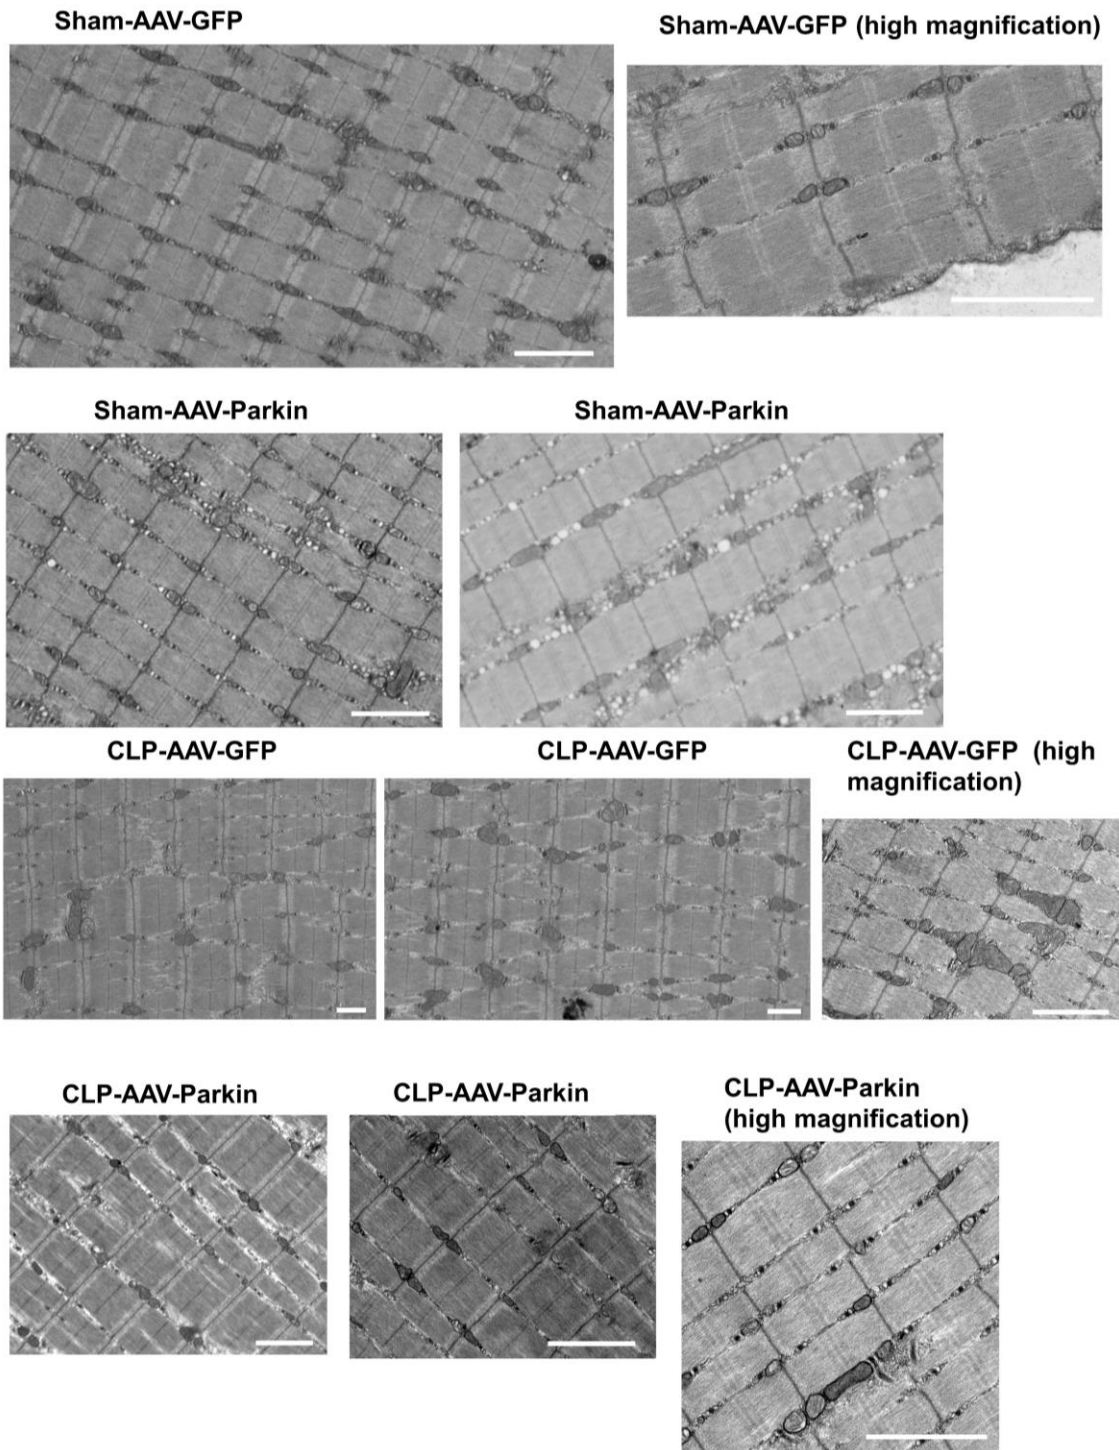

Representative longitudinal TEM images that were used to assess the impact of sepsis and Parkin overexpression on mitochondrial morphology. Scale bar: 2 $\mu$ m.

**Table S1.** List of antibodies

| <b>Protein</b>     | <b>Dilution</b> | <b>Product no.</b> | <b>Source</b>             |
|--------------------|-----------------|--------------------|---------------------------|
| BNIP3              | 1/1000          | B7931              | Sigma-Aldrich             |
| DRP1               | 1/1000          | # 611113           | BD Biosciences            |
| p-DRP1 (Ser616)    | 1/1000          | #3455              | Cell Signaling Technology |
| OPA1               | 1/1000          | #42364             | Abcam                     |
| MFN2               | 1/1000          | #50843             | Abcam                     |
| LC3A/B             | 1/1000          | #12741             | Cell Signaling Technology |
| PARKIN             | 1/1000          | sc-32282           | Santa Cruz                |
| SQSTM1 (p62)       | 1/1000          | clone 2C11         | Novus Biologicals         |
| OXPPOS             | 1/1000          | ab110413           | Abcam / MitoSciences      |
| GAPDH (14C10)      | 1/5000          | #2118              | Cell Signaling Technology |
| VADC1/Porin        | 1/1000          | ab14734            | Abcam                     |
| p-Akt (Ser473)     | 1/1000          | #9271              | Cell Signaling Technology |
| Akt                | 1/1000          | #9272              | Cell Signaling Technology |
| p-4EBP1 (Thr37/46) | 1/1000          | #9459              | Cell Signaling Technology |
| 4EBP1              | 1/1000          | #9644              | Cell Signaling Technology |

**Table S2.** List of qPCR primers

|                      | <b>Forward primer (5'-3')</b> | <b>Reverse primer (3'-5')</b> |
|----------------------|-------------------------------|-------------------------------|
| <i>β-Actin</i>       | AACCGTGAAAAGATGACCCAG         | CACAGCCTGGATGGCTACGTA         |
| <i>18S</i>           | TGCGGTTTAGCGTTCGGTGTC         | CCAAGTGGCCAAAGCGTA            |
| <i>Cyclophilin B</i> | GCGTCTCTTCGAGCTGTTT           | CTGGCACATGAATCCTGGAA          |
| <i>Bax</i>           | GGAGATGAACTGGATAGCAATATGG     | GTTTGCTAGCAAAGTAGAAGAGGGC     |
| <i>Bid</i>           | CACAACATCCAGCCCACT            | CTCCATGTCTCTGGGGAAGG          |
| <i>Bim</i>           | GCAATGGCTTCCATACGACA          | TTGCAAACACCCTCCTTGTTG         |
| <i>Bcl2</i>          | CATGTGTGTGGAGAGCGTCA          | ATCCCAGCCTCCGTTATCCT          |
| <i>BclXL</i>         | TGGGGAGCAACATTCATCAG          | AGTCCTCCTCCATCCCTTC           |
| <i>Mfn1</i>          | ATGGCAGAAACGGTATCTCCA         | CTCGGATGCTATTCGATCAAGTT       |
| <i>Mfn2</i>          | GCTCAGGAGCAGCGGGTTTA          | TGTGGACACCTGCCTTTCCA          |
| <i>Opal</i>          | CAGAGGATGGTGTCTCGTGGA         | TCCGTCTTGGATGCACAGGA          |
| <i>Fis1</i>          | TGTCCAAGAGCACGCAATTTG         | CCTCGCACATACTTTAGAGCCTT       |
| <i>Drp1</i>          | CCTCAGATCGTCGTAGTGGGA         | GTTCCCTCTGGGAAGAAGGTCC        |
| <i>Lc3b</i>          | CGATACAAGGGGGAGAAGCA          | ACTTCGGAGATGGGAGTGGA          |
| <i>Bnip3</i>         | TTCCACTAGCACCTTCTGATGA        | GAACACCGCATTACAGAACAA         |
| <i>p62/SQSTM1</i>    | GCACCTGTCTGAGGGCTTCT          | GCTCCAGTTTCTGGTGGAC           |
| <i>Park2</i>         | TCTTCCAGTGTAACCACCCTGTC       | GGCAGGGAGTAGCCAAGTT           |
| <i>Gabarapl1</i>     | GAGGACCACCCCTTCG              | CGGAGGGCACAAGGTACTTC          |
| <i>Fbxo32</i>        | TGGGTGTATCGGATGGAGAC          | TCAGCCTCTGCATGATGTTT          |
| <i>Trim63</i>        | TGCTTGGCACTTGAGAGGAA          | AGAAGCTGGGCTTCATCGAG          |
| <i>Tfam</i>          | GCACCCTGCAGAGTGTTCAA          | CGCCCAGGCCTCTACCTT            |
| <i>Nrf1</i>          | CGCTCATCCAGGTGGTACA           | TCCATCAGCCACAGCAGAGT          |
| <i>Nrf2</i>          | CTCCCAGGTTGCCACATTC           | TCAGTCATGGCTGCCTCCAG          |
| <i>Sirt1</i>         | GGATGATATGACAAACCCAG          | ACAGGAGACAGAAACCCAG           |
| <i>Sirt3</i>         | CCCCGCTGCCCTGTCTGATC          | TGATGAGCAGTCGGGGCACTG         |
| <i>Pgc1-α</i>        | TTGCTAGCGGTCCTCACAGA          | GTCAGGCATGGAGGAAGGAC          |
| <i>Pgc1-β</i>        | GACCCCTTCAAGCCAGACAC          | TGAGACTGGTTGGGTTGTGG          |
